# Supplementary material for: Droplets for Gene Editing Using CRISPR-Cas9 and Clonal Selection Improvement Using Hydrogels
Source: MDPI journal article supplement (doi:10.3390/mi15030413), 2024-03-19
Supplement: s1 [file s1]

## Supplementary Information

# Droplets for gene editing using CRISPR-Cas9 and clonal selection improvement using hydrogels.

Camilo Pérez-Sosa<sup>1</sup>, Maximiliano S. Pérez<sup>1,2,5</sup>, Alexander Paolo Vallejo-Janeta<sup>1</sup>, Shekhar Bhansali<sup>4</sup>, Santiago Miriuka<sup>3</sup> and Betiana Lerner<sup>1,4,5</sup>

<sup>1</sup> IREN Center, National Technological University, Buenos Aires 1706, Argentina<sup>2</sup>

<sup>2</sup> Institute of Biomedical Engineering, Buenos Aires University (UBA), Buenos Aires, C1063ACV, Argentina

<sup>3</sup> National Council for Scientific and Technical Research - Foundation for the Fight against Neurological Diseases of Childhood, (LIAN-CONICET-FLENI), FLENI Sede Escobar, Ruta 9 Km 53, 1625, Belén de Escobar, Buenos Aires, Argentina

<sup>4</sup> Department of Electrical and Computer Engineering, Florida International University, Miami, Florida 33174, US

<sup>5</sup> Collaborative Research Institute Intelligent Oncology (CRIION), Hermann-Herder-Straße 4, 79104 Freiburg im Breisgau, Germany

\* Correspondence: belerner@fiu.edu; maxperez@fiu.edu

## Code FIJI

```
channel_segment = 1; median_radius = 4; threshold_method = "Otsu"; min_particle_size = 10;
```

```
// Get the title of the image original_image = getTitle(); // Run all the preprocessing needed. Like setting the measurements, closing images, cleaning ROIs runPreprocessing();
```

```
// This does the actual segmentation of the data runSegmentation(channel_segment, median_radius, threshold_method);  
96 //
```

```
This produces the results analyzeParticles (original_image, min_particle_size); // The postProcessing script creates the output image so that we may check the results postProcessing(original_image);
```

```
// Preprocessing function to prepare Fiji's environment to analyze the image function runPreprocessing() { // Some preprocessing // Make sure there are no ROIs in the ROI manager roiManager("Reset");
```

```
// Ensure we are computing the right results, making sure that // the label is displayed and that we keep the stack position information run("Set Measurements...", "area mean shape stack display redirect=None decimal=3"); // We explicitly do not close the results table because
```

```
// we want the results to be appended for each image that will be analysed // hence the warning above // Close all other images, to reduce clutter close("\ \Others"); }
```

```
// This filters and segments the image so that we get a binary mask at the end function runSegmentation(channel_segment, median_radius, threshold_method) { 97 // Run the segmentation.
```

```
// Duplicate the first channel (DAPI)
```

```
// Filter the image with a median filter and reduce intensity variation by taking the square root // Set an auto-threshold
and get a mask // Clean the mask with a median filter and a watershed run("Duplicate...", "title=DAPI duplicate chan-
nels="+channel_segment); run("Median...", "radius="+median_radius);
run("32-bit"); run("Square Root"); run("Enhance Contrast", "saturated=0.35"); setAutoThreshold(threshold_method+"
dark no-reset");
//setAutoThreshold("MaxEntropy dark no-reset"); setOption("BlackBackground", true); run("Convert to Mask");
run("Median...", "radius=2"); //run("Watershed"); // End of segmentation
```

**Figure S1.** Detail of the sequence used in IMAGEJ for single cell analysis and clone growth.

## Supplementary information 2

### Sequence plasmid H2B- Celurian

ACGTCAGATCCGCTAGCGCTACCGGTCGCCACCATGGTGAGCAAGGGCGAGGAGCTGTTAC-  
CGGGGTGGTGCCCATCCTGGTCGAGCTGGACGGCGACGTAAACGGCCACAAGTTCAGCGTGTCCGGCGAGG  
GCGAGGGCGATGCCACCTACGGCAAGCTGACCCTGAAGTTCATCTGCACCACCGGCAA-  
GCTGCCCCGTGCCCTGGCCACCCTCGTGACCACCCTGACCTGGGGCGTGCACTGCTTCGCCCCGCTACCCCGAC  
CACATGAAGCAGCAGACTTCTTCAAGTCCGCCATGCCCCGAAGGCTACGTCCAGGAGCGCAC-  
CATCTTCTTCAAGGACGACGGCAACTACAAGACCCGCGCCGAGGTGAAGTTCGAGGGCGACACCCTGGTGA  
ACCGCATCGAGCTGAAGGGCATCGACTTCAAGGAGGACGGCAACATCCTGGGGCACAAGCTG-  
GAGTACAACGCCATCAGCGACAACGTCTATATCACCGCCGACAAGCAGAAGAAGCGCATCAAGGCCAACTT  
CAAGATCCGCCACAACATCGAGGACGGCAGCGTGACGCTCGCCGACCACTACCAG-  
CAGAACACCCCCATCGGCGACGGCCCCGTGCTGCTGCCCCGACAACCACTACCTGAGCACCCAGTCCAAGCTG  
AGCAAAGACCCCAACGAGAAGCGCGATCACATGGTCCTGCTGGAGTTCGTGACCGCCGCCGG-  
GATCACTCTCGGCATGGACGAGCTGTACAAGTCCGGAATCAGATCTGGAGGCTCCGGAGGCCAGAGCCAG  
CGAAGTCTGCTCCCGCCCCGAAAAAGGGCTCCAAGAAGGCGGTGACTAAGGCGCAGAA-  
GAAAGGCGGCAAGAAGCGCAAGCGCAGCCGCAAGGAGAGCTATTCCATCTATGTGTACAAGGTTCTGAAGC  
AGGTCCACCCTGACACCGGCATTTTCGTCCAAGGCCATGGGCATCATGAATTCGTTTGTGAAC-  
GACATTTTCGAGCGCATCGCAGGTGAGGCTTCCCGCCTGGCGCATTACAACAAGCGCTCGACCATCACCTCC  
AGGGAGATCCAGACGGCCGTGCGCCTGCTGCTGCCTGGGGAGTTGGCCAAGCAC-  
GCCGTGTCCGAGGGTACTAAGGCCATCACCAAGTACACCAGCGCTAAGTAAGGATCCACCGGATCTAGATA  
ACTGATCATAATCAGCCATACCACATT.
